# Supplementary material for: Effect of substituting donors on the hole mobility of hole transporting materials in perovskite solar cells: a DFT study
Source: Royal Society of Chemistry journal article supplement (doi:10.1039/d3cp04310j), 2023-12-04
Supplement: d3cp04310j1.pdf [file d3cp04310j1.pdf]

## Electronic Supporting Information

### Effect of substituting donors on Hole Mobility of Hole Transporting Materials in Perovskite Solar Cells

Md Al Mamunur Rashid<sup>a</sup>, Sein Min<sup>b</sup>, Sung Keon Namgoong<sup>b</sup>, Keunhong Jeong<sup>c,\*</sup>

<sup>a</sup>Clean Energy Research Center, Korea Institute of Science and Technology, Seoul 02792, South Korea

<sup>b</sup>Department of Chemistry, Seoul Women's University, Seoul 01797, South Korea

<sup>c</sup>Department of Physics and Chemistry, Korea Military Academy, Seoul, 01805, South Korea

*\*Corresponding Author: email: doas1mind@berkeley.edu; doas1mind@kma.ac.kr*

**Figure S1:** Optimized Structures, and HOMO-LUMO of the designed HTMs.

**Figure S2:** Chemical hardness and Solvation Free energy of the designed HTMs.

**Figure S3:** Hole and Electron Reorganization Energy of the designed HTMs.

**Table S1:** Charge transfer Integral, centroid distance, Hole hopping rate, and hole mobility of the designed HTMs.

**Optimized Structure**

**HOMO**

**LUMO**

**D1**

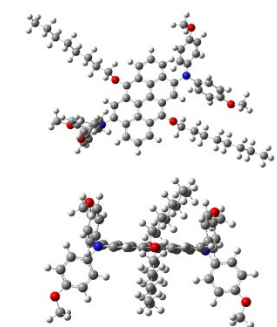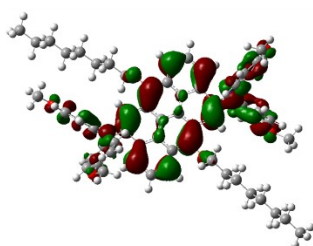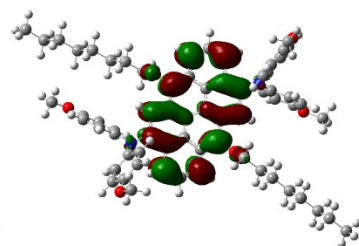

**D2**

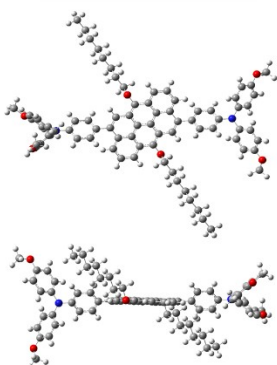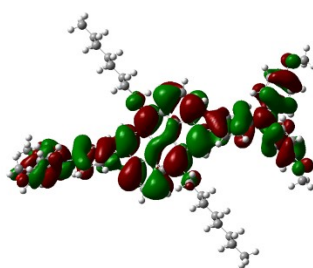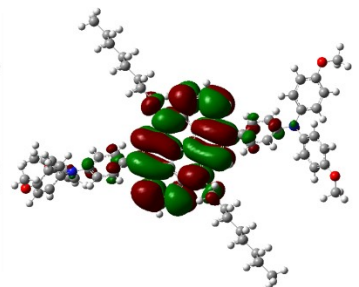

**D3**

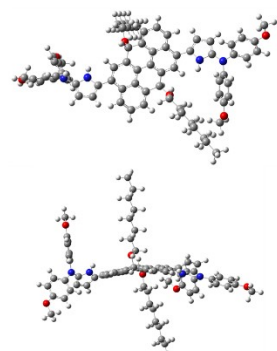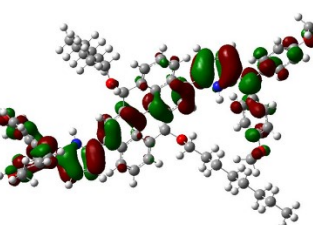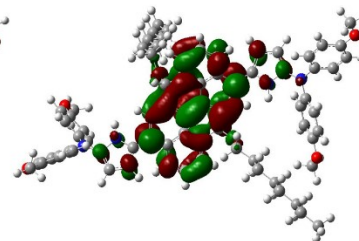

**D4**

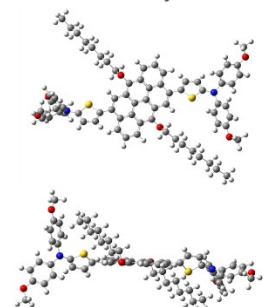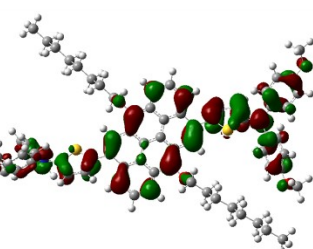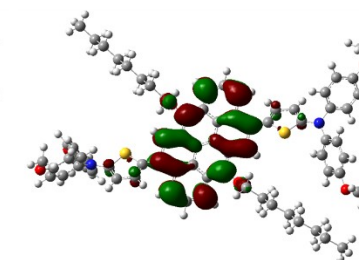

**D5**

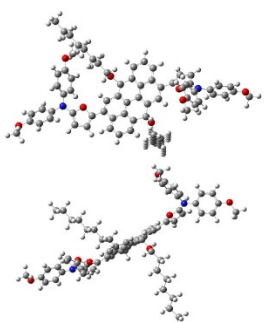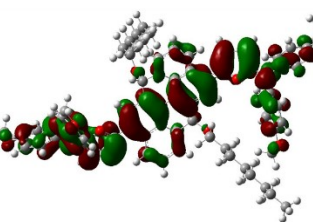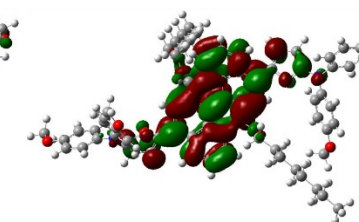

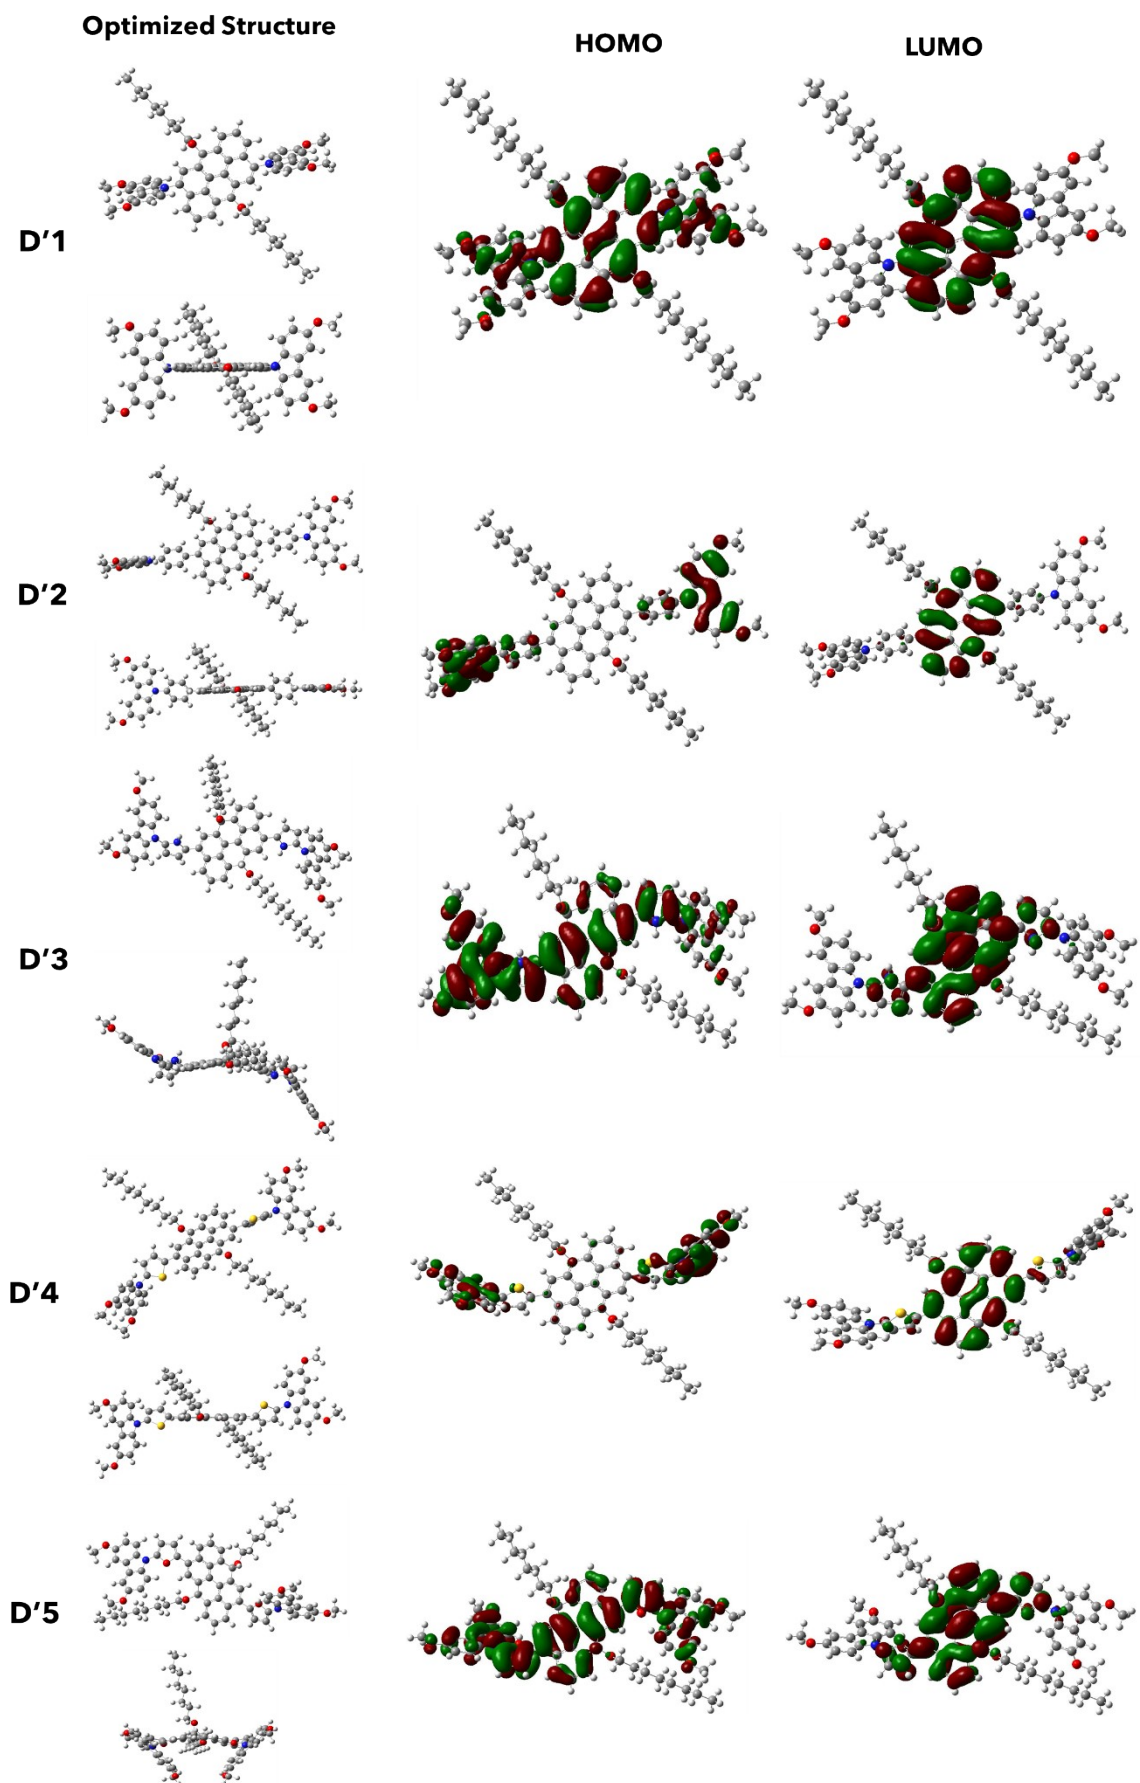

Figure S1: Optimized Structures, and HOMO-LUMO of the designed HTMs.

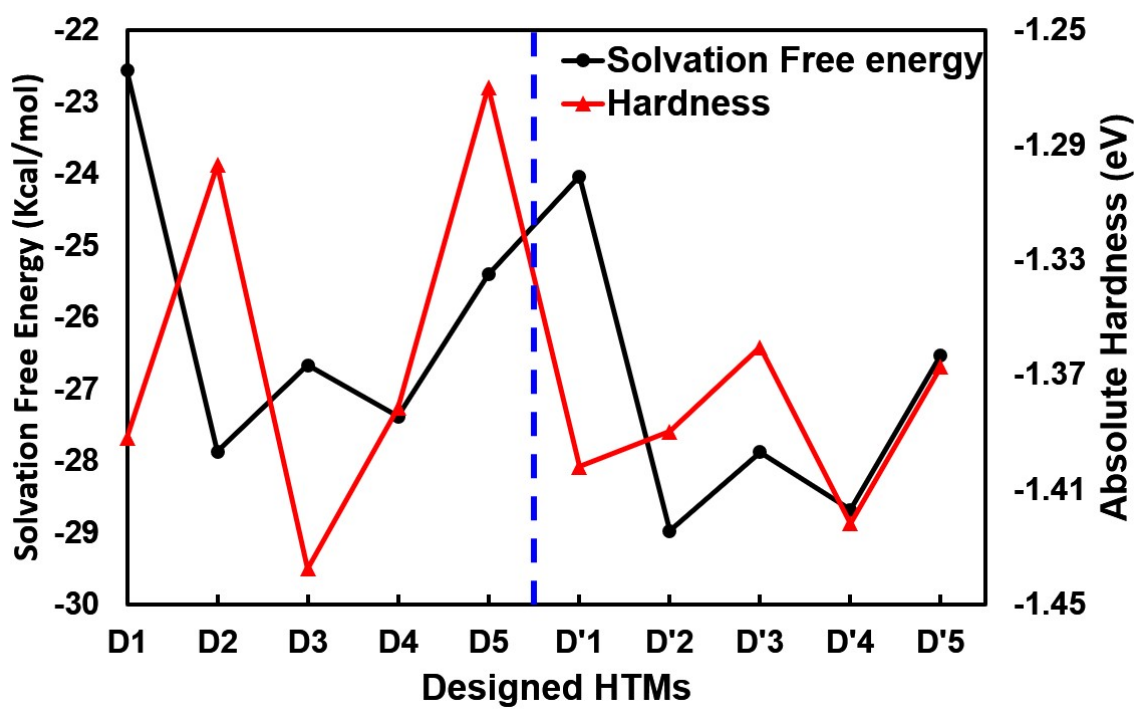

Figure S2: Chemical hardness and Solvation free energy of the designed HTMs.

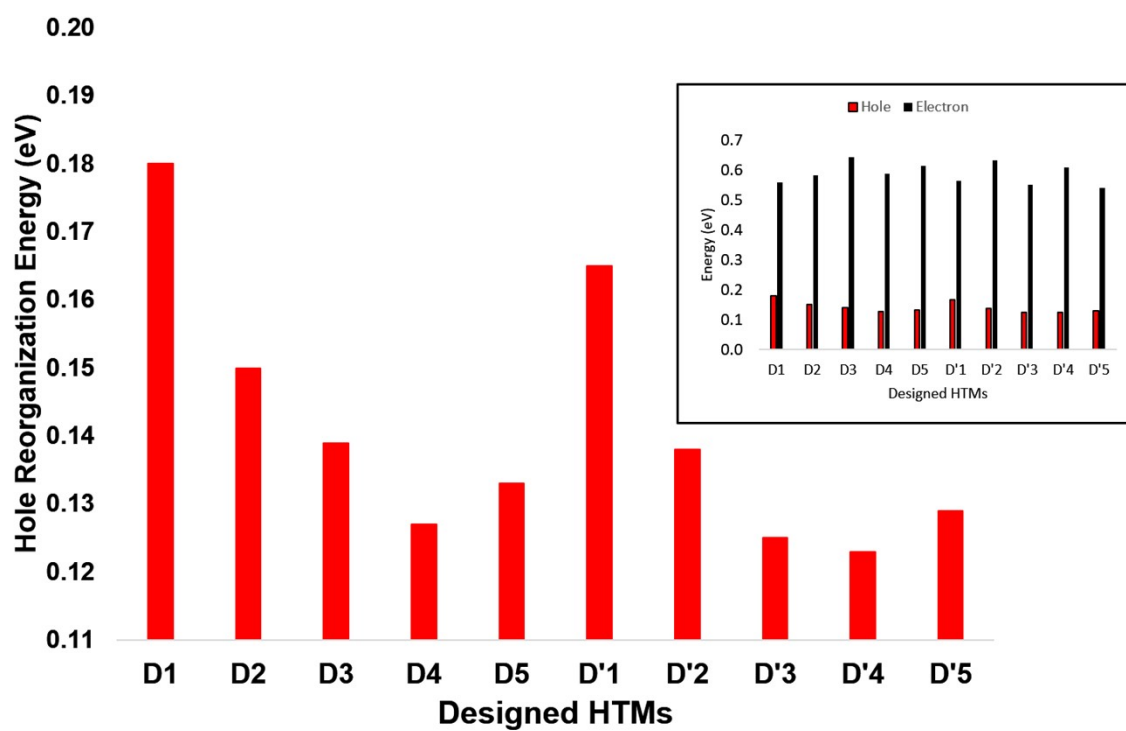

**Figure S3:** Hole reorganization energy of the designed HTMs. Both the hole and electron reorganization energy of the designed HTMs (inset).

**Table S1:** Charge transfer Integral, centroid distance, Hole hopping rate, and hole mobility of the designed HTMs.

| Molecules | Pathways | Charge Integral (eV) | Centroid Distance (Å) | Hole Reorganization Energy (eV) | Hole hopping rate (S <sup>-1</sup> ) | Hole Mobility (cm <sup>2</sup> V <sup>-1</sup> s <sup>-1</sup> ) |
|-----------|----------|----------------------|-----------------------|---------------------------------|--------------------------------------|------------------------------------------------------------------|
| D1        | 1        | 1.632010-03          | 29.36                 |                                 | 5.8436x10 <sup>9</sup>               |                                                                  |
|           | 2        | 1.905010-03          | 27.00                 |                                 | 7.9622x10 <sup>9</sup>               |                                                                  |
|           | 3        | 1.905010-03          | 28.63                 |                                 | 7.9622x10 <sup>9</sup>               |                                                                  |
|           | 4        | 6.803010-04          | 26.79                 |                                 | 1.0154x10 <sup>9</sup>               |                                                                  |
|           | 5        | 2.176010-03          | 17.84                 |                                 | 1.0388x10 <sup>10</sup>              |                                                                  |
|           | 6        | 1.210910-02          | 18.00                 |                                 | 3.2170x10 <sup>11</sup>              |                                                                  |
|           | 7        | 2.993010-02          | 11.31                 | 0.180                           | 1.9654x10 <sup>12</sup>              | 2.589x10 <sup>-4</sup>                                           |
|           | 8        | 1.361010-04          | 18.00                 |                                 | 4.0641x10 <sup>7</sup>               |                                                                  |
| D2        | 1        | 5.171010-03          | 43.5                  |                                 | 5.8526x10 <sup>11</sup>              |                                                                  |
|           | 2        | 2.993310-03          | 43.6                  |                                 | 1.9611x10 <sup>11</sup>              |                                                                  |
|           | 3        | 3.945610-03          | 46.92                 |                                 | 3.4074x10 <sup>11</sup>              |                                                                  |
|           | 4        | 3.537510-03          | 46.89                 |                                 | 2.7390x10 <sup>11</sup>              |                                                                  |
|           | 5        | 2.217710-02          | 19.01                 | 0.150                           | 1.0765x10 <sup>13</sup>              | 4.0028x10 <sup>-3</sup>                                          |
|           | 6        | 7.891310-03          | 17.51                 |                                 | 1.3630x10 <sup>12</sup>              |                                                                  |
|           | 7        | 1.224510-02          | 19.43                 |                                 | 3.2818x10 <sup>12</sup>              |                                                                  |
| D3        | 1        | 1.088510-03          | 44.20                 |                                 | 1.8684610x10                         |                                                                  |
|           | 2        | 3.537510-03          | 39.58                 |                                 | 1.9734210x11                         |                                                                  |
|           | 3        | 1.278910-02          | 17.35                 | 0.139                           | 2.5792910x12                         | 1.0948x10 <sup>-3</sup>                                          |
|           | 4        | 1.020410-02          | 20.37                 |                                 | 1.6419810x12                         |                                                                  |
|           | 5        | 4.082010-04          | 19.73                 |                                 | 2.6276810x09                         |                                                                  |
|           | 6        | 3.537510-03          | 19.52                 |                                 | 1.9734210x11                         |                                                                  |
| D4        | 1        | 7.965010-03          | 31.71                 |                                 | 1.6771710x12                         |                                                                  |
|           | 2        | 1.755010-03          | 42.28                 |                                 | 8.1425410x10                         |                                                                  |
|           | 3        | 3.510010-03          | 37.48                 |                                 | 3.2570210x11                         |                                                                  |
|           | 4        | 4.860010-03          | 32.78                 |                                 | 6.2442210x11                         |                                                                  |
|           | 5        | 8.100010-04          | 36.78                 |                                 | 1.7345110x10                         |                                                                  |
|           | 6        | 6.750010-04          | 35.86                 |                                 | 1.2045210x10                         |                                                                  |
|           | 7        | 2.295010-03          | 31.52                 |                                 | 1.3924210x11                         |                                                                  |
|           | 8        | 6.858010-02          | 15.56                 | 0.127                           | 1.2433710x14                         | 3.0768x10 <sup>-3</sup>                                          |
|           | 9        | 3.510010-03          | 11.00                 |                                 | 3.2570210x11                         |                                                                  |
|           | 10       | 6.521010-02          | 19.62                 |                                 | 1.1241810x14                         |                                                                  |
| D5        | 1        | 1.250010-04          | 35.58                 |                                 | 5.4094510x08                         |                                                                  |
|           | 2        | 5.400010-03          | 39.36                 |                                 | 1.0095310x12                         |                                                                  |
|           | 3        | 1.920010-03          | 36.74                 |                                 | 1.2762510x11                         |                                                                  |
|           | 4        | 1.930010-03          | 39.36                 |                                 | 1.2895810x11                         |                                                                  |
|           | 5        | 1.674010-02          | 19.52                 |                                 | 9.7016210x12                         |                                                                  |
|           | 6        | 1.053010-02          | 29.58                 |                                 | 3.8387510x12                         |                                                                  |
|           | 7        | 5.413510-02          | 15.71                 | 0.133                           | 1.0145910x14                         | 9.4314x10 <sup>-2</sup>                                          |
| D'1       | 1        | 5.5410-03            | 36.50                 |                                 | 9.5038910x11                         |                                                                  |
|           | 2        | 5.6710-03            | 40.57                 |                                 | 9.9731510x11                         |                                                                  |
|           | 3        | 2.1610-03            | 41.30                 |                                 | 1.4473510x11                         |                                                                  |
|           | 4        | 6.3510-03            | 36.75                 |                                 | 1.2489110x12                         |                                                                  |

|     |    |             |       |       |              |                         |
|-----|----|-------------|-------|-------|--------------|-------------------------|
|     | 5  | 6.4810-03   | 40.34 |       | 1.3026210x12 |                         |
|     | 6  | 5.9410-03   | 35.45 |       | 1.0945610x12 |                         |
|     | 7  | 2.3010-03   | 35.71 |       | 1.6339210x11 |                         |
|     | 8  | 4.8610-03   | 40.38 |       | 7.3272110x11 |                         |
|     | 9  | 8.1010-03   | 14.25 |       | 2.0353410x12 |                         |
|     | 10 | 2.7310-02   | 10.51 | 0.165 | 2.3069410x13 | 2.6197x10 <sup>-3</sup> |
| D'2 | 1  | 2.258610-01 | 40.09 |       | 2.1760510x15 |                         |
|     | 2  | 1.130010-01 | 44.37 |       | 5.4466210x14 |                         |
|     | 3  | 1.167810-01 | 41.76 |       | 5.8171210x14 |                         |
|     | 4  | 2.637910-01 | 42.72 |       | 2.9684210x15 |                         |
|     | 5  | 1.067910-01 | 44.37 |       | 4.8644010x14 |                         |
|     | 6  | 1.298710-01 | 18.21 |       | 7.1949210x14 |                         |
|     | 7  | 9.504010-02 | 15.08 | 0.138 | 3.8532010x14 | 1.4631x10 <sup>-1</sup> |
|     | 8  | 4.158010-02 | 12.61 |       | 7.3752610x13 |                         |
| D'3 | 1  | 3.375010-03 | 38.50 |       | 2.4515410x11 |                         |
|     | 2  | 3.631510-02 | 43.46 |       | 2.8383310x13 |                         |
|     | 3  | 2.632510-02 | 41.31 |       | 1.4915110x13 |                         |
|     | 4  | 1.363510-02 | 40.79 |       | 4.0013010x12 |                         |
|     | 5  | 1.827910-01 | 43.46 |       | 7.1911010x14 |                         |
|     | 6  | 1.350010-03 | 15.53 |       | 3.9224610x10 |                         |
|     | 7  | 2.052010-02 | 13.52 |       | 9.0624510x12 |                         |
|     | 8  | 6.480010-02 | 20.18 |       | 9.0373410x13 |                         |
|     | 9  | 1.773910-01 | 15.03 | 0.125 | 6.7725010x14 | 2.6133x10 <sup>-1</sup> |
| D'4 | 1  | 8.370010-03 | 36.25 |       | 2.4708410x12 |                         |
|     | 2  | 3.375010-03 | 39.04 |       | 4.0173610x11 |                         |
|     | 3  | 1.215010-03 | 34.97 |       | 5.2065010x10 |                         |
|     | 4  | 8.910010-03 | 37.62 |       | 2.7999410x12 |                         |
|     | 5  | 6.885010-03 | 36.64 |       | 1.6718610x12 |                         |
|     | 6  | 1.782010-02 | 15.08 |       | 1.1199810x13 |                         |
|     | 7  | 3.064510-02 | 14.50 | 0.123 | 3.3121710x13 | 7.1727x10 <sup>-3</sup> |
|     | 8  | 7.290010-03 | 20.86 |       | 1.8743410x12 |                         |
| D'5 | 1  | 3.510010-02 | 38.42 |       | 2.9358010x13 |                         |
|     | 2  | 1.552510-02 | 43.06 |       | 5.7434910x12 |                         |
|     | 3  | 8.775010-03 | 15.51 |       | 1.8348810x12 |                         |
|     | 4  | 2.484010-02 | 19.03 |       | 1.4703310x13 |                         |
|     | 5  | 9.760510-02 | 13.90 | 0.129 | 2.2701610x14 | 7.5088x10 <sup>-2</sup> |
|     | 6  | 1.066510-02 | 39.66 |       | 2.7104010x12 |                         |
|     | 7  | 3.105010-03 | 36.40 |       | 2.2973910x11 |                         |
|     | 8  | 3.145510-02 | 38.13 |       | 2.3577210x13 |                         |
